# Supplementary material
Source: PubMed Central journal article supplement (PMC5891353)
Supplement: NIHMS952279-supplement.pdf [file NIHMS952279-supplement.pdf]

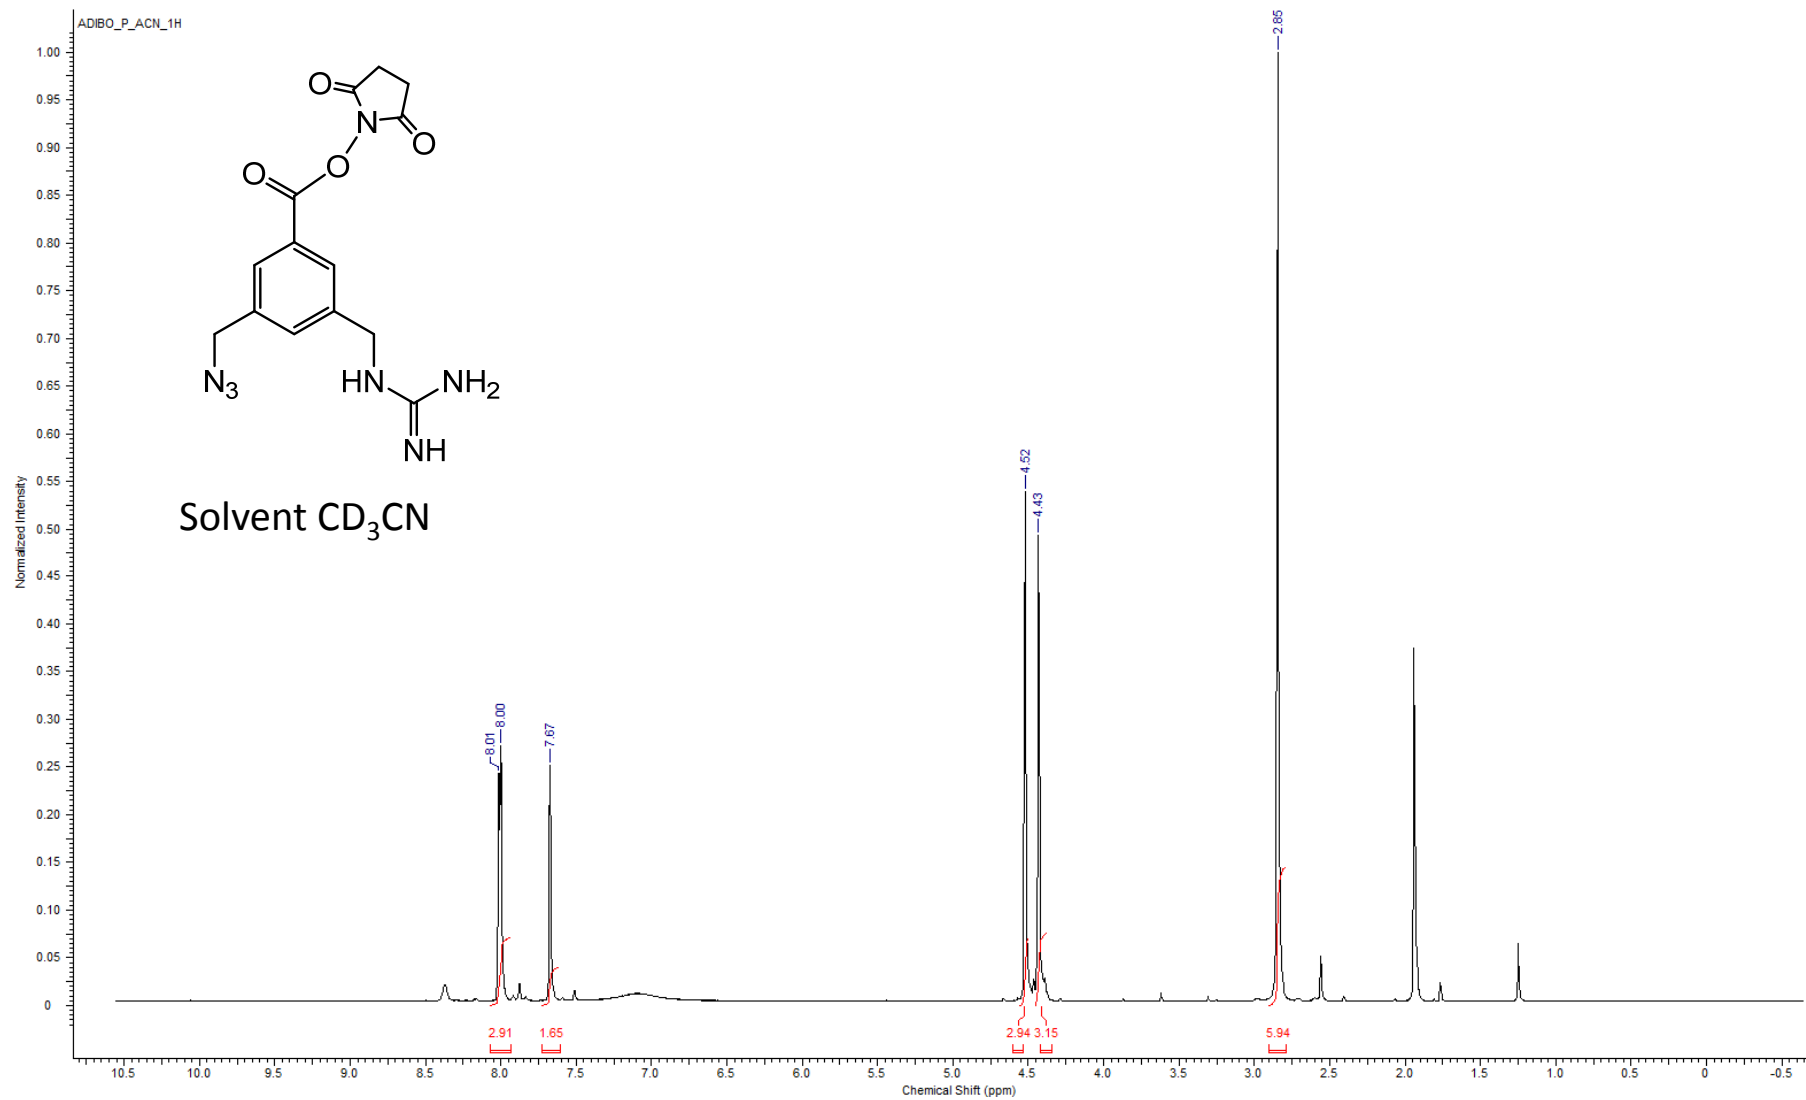

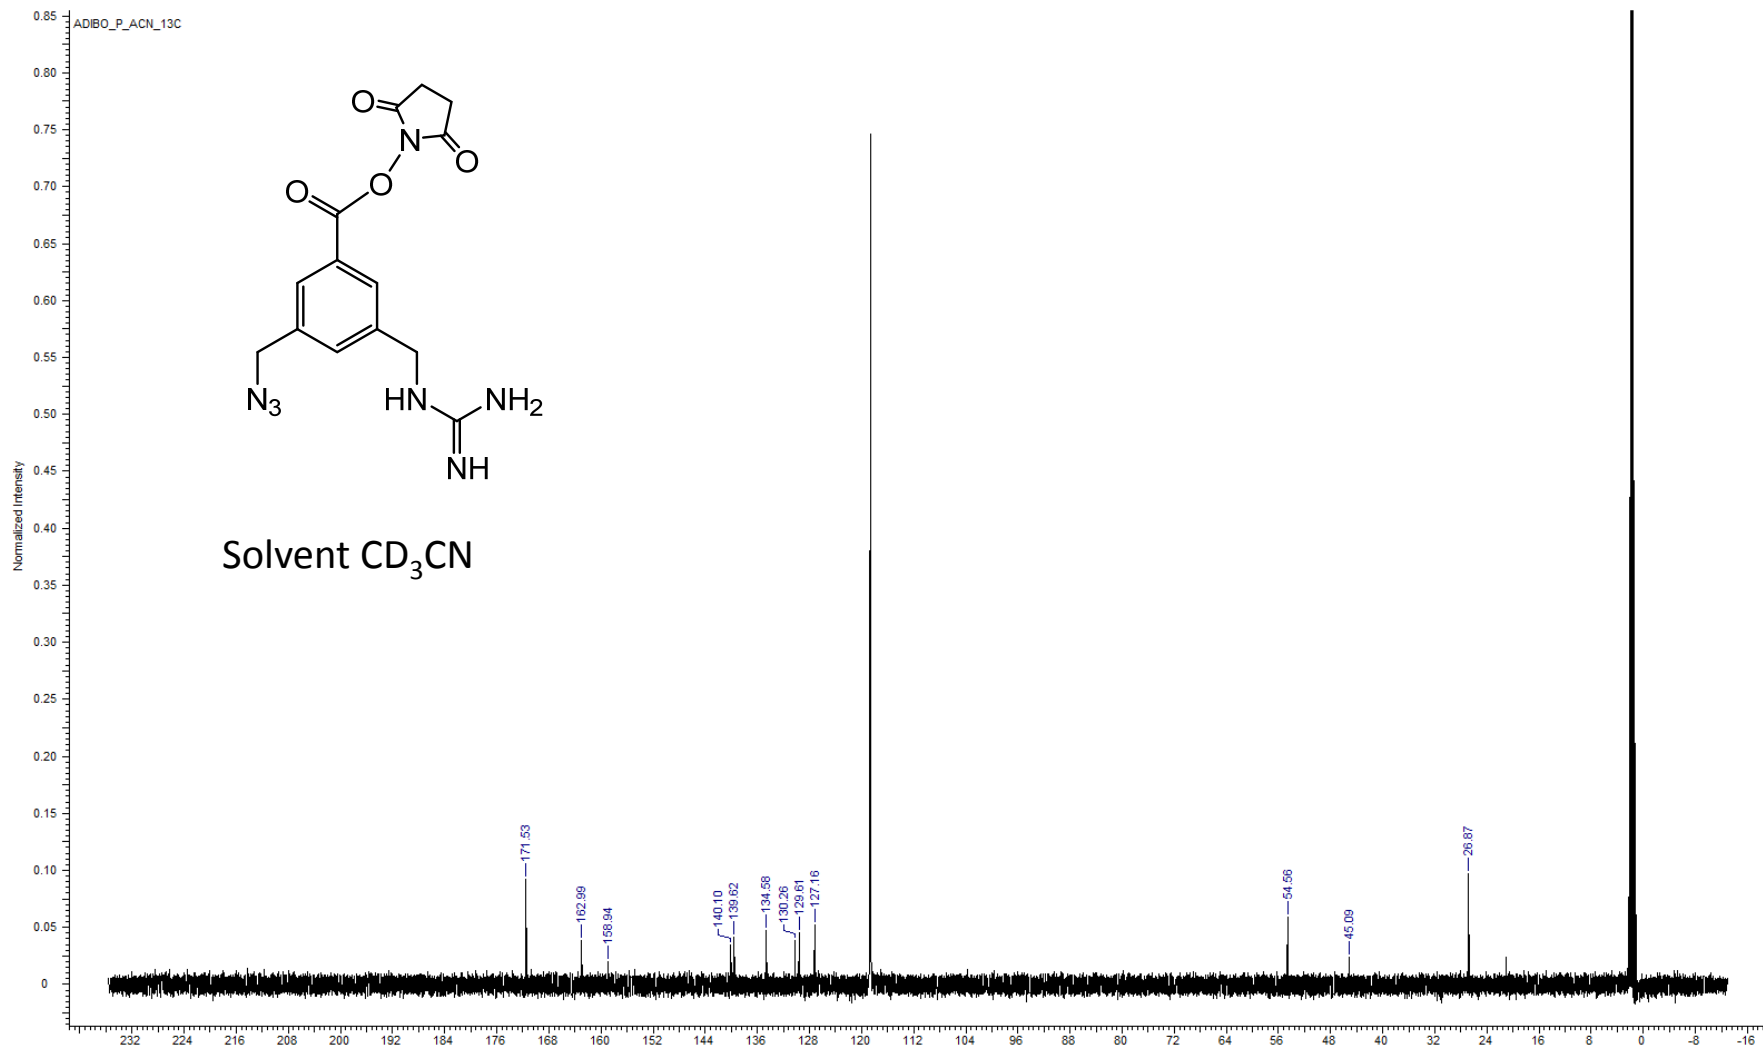

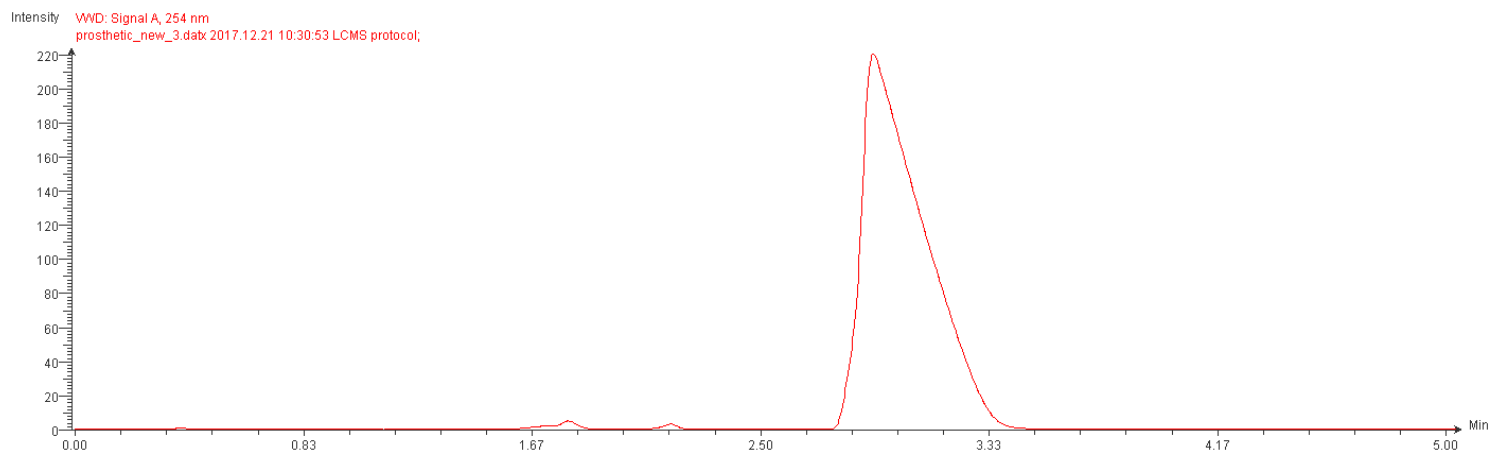

Analytical HPLC of the isolated product was performed using the analytical Poroshell column with flow rate of 2 mL/min with a gradient consisting of 0.1% formic acid in both water (solvent A) and acetonitrile (solvent B); the proportion of B was increased from 5% to 25% in 5 min. The product eluted with a retention time of 2.9 min and its purity was ~99%.
